# Supplementary material
Source: PubMed Central journal article supplement (PMC3261311)
Supplement: NIHMS340808-supplement-1.pdf [file NIHMS340808-supplement-1.pdf]

SUPPLEMENTAL MATERIAL

Appendix A. Diagnoses and ICD-9 Codes used to identify index myocardial infarction, comorbidities and procedures

| <i>Diagnoses</i>                                  | <i>ICD-9 Codes</i>                                                                                                                                                                          |
|---------------------------------------------------|---------------------------------------------------------------------------------------------------------------------------------------------------------------------------------------------|
| Myocardial Infarction                             | ST-segment elevation MI: ICD-9 Dx codes: 410.0-6, 410.8 5th digit 0 or 1 for all<br><br>Non-ST segment elevation MI: ICD-9 Dx codes 410.71, 410.70, 410.90, 410.91 5th digit 0 or 1 for all |
| Chronic Renal Disease                             | ICD-9 Dx and V codes: 585-586, V420, V451, V56.x                                                                                                                                            |
| Cancer                                            | ICD-9 Dx and V codes: 140-171.9, 174-195.9, 196-199.9, 200-208.9, 273.0-273.3, V1046                                                                                                        |
| Heart Failure                                     | ICD-9 Dx code: 402.01, 402.11, 402.91, 425.0-9, 428.0-428.9, 429.3, 404.01, 404.03, 404.11, 404.13, 404.91, 404.93                                                                          |
| Unstable Angina                                   | ICD-9 Dx codes: 411.x, 413.x                                                                                                                                                                |
| Pulmonary Disease                                 | Chronic Non-Asthmatic Lung Disease: ICD-9 Dx code: 415.0, 416.8, 416.9, 491.0, 492.0, 494.0, 496.0<br><br>Asthmatic Lung Disease: ICD-9 Dx code 493.xx                                      |
| Dementia                                          | ICD-9 Dx code: 290.xx, 331.0-331.2                                                                                                                                                          |
| Diabetes and Diabetes with Complications combined | ICD-9 Dx code: 250.xx                                                                                                                                                                       |
| Cerebrovascular Disease                           | ICD-9 Dx code: 362.34, 430-436.9, 437.0, 437.1, 437.9, 781.4, 784.3 997.0                                                                                                                   |

|                                    |                                                                                         |
|------------------------------------|-----------------------------------------------------------------------------------------|
| Peptic Ulcer Disease               | ICD-9 Dx code: 531- 534                                                                 |
| Mild and Moderate Liver Disease    | ICD-9 Dx code: 571.2, 571.5, 571.6, 571.8, 571.9, 572.2-572.4, 456.0x-456.29            |
| Depression                         | ICD-9 Dx codes: 293.83,296.2,296.3, 296.90, 296.99, 298.0, 300.4,301.12,309.0,309.1,311 |
| Cardiac catheterization            | ICD-9 procedure codes, 37.22, 37.23, 88.55, 88.56, 88.57, 88.52, 88.53, 88.54           |
| Percutaneous coronary intervention | ICD-9 procedure codes, 36.06, 36.07, 36.09, 00.66                                       |
| Drug Eluting Stent                 | ICD-9 36.07, DRG 526, 527, 246, 247                                                     |
| Coronary artery bypass graft       | ICD-9 procedure codes 36.10- 36.19                                                      |

Appendix B. Prescription Fill Sensitivity Analysis Using Unrestricted Cohort:

**Adjusted Probabilities of a Clopidogrel Prescription Fill in the First 7 and First 90 Days Following Hospitalization with Receipt of a Drug Eluting Coronary Artery Stent.**

|                             | Clopidogrel Fill<br>0 to 7 | 95% CI        | Clopidogrel Fill 0 to 90 | 95% CI        |
|-----------------------------|----------------------------|---------------|--------------------------|---------------|
| Age 70 to 74                | -0.017                     | [-.036,.001]  | -0.009                   | [-.025,.008]  |
| Age 75 to 79                | -.019*                     | [-.038,-.000] | -0.013                   | [-.029,.004]  |
| Age 80 to 84                | -.032**                    | [-.053,-.011] | -.029**                  | [-.048,-.011] |
| Age >84                     | -.111**                    | [-.135,-.086] | -.114**                  | [-.135,-.093] |
| Black                       | -.090**                    | [-.118,-.063] | -.073**                  | [-.097,-.049] |
| Female                      | -.032**                    | [-.045,-.018] | -.033**                  | [-.045,-.021] |
| Income 2nd Quartile         | 0.007                      | [-.013,.027]  | 0.003                    | [-.015,.020]  |
| Income 3rd Quartile         | -0.016                     | [-.037,.005]  | -0.012                   | [-.031,.007]  |
| Income Top Quartile         | -0.009                     | [-.032,.015]  | -0.011                   | [-.032,.010]  |
| Poverty                     | -0.078                     | [-.187,.030]  | -0.082                   | [-.177,.013]  |
| Co-insurance 10%-19%        | -.075**                    | [-.102,-.047] | -.057**                  | [-.080,-.033] |
| Co-insurance 20%-40%        | -.031**                    | [-.049,-.013] | -.018*                   | [-.034,-.002] |
| Co-insurance > 40%          | 0                          | [-.018,.018]  | .018*                    | [.002,.034]   |
| Stent in 2007 vs. 2006      | -0.001                     | [-.014,.012]  | -0.007                   | [-.018,.005]  |
| Length Of Stay ><br>Median  | -.029**                    | [-.044,-.014] | -.033**                  | [-.047,-.019] |
| AMI                         | .139**                     | [.125,.153]   | .131**                   | [.120,.143]   |
| Peptic Ulcer                | 0.019                      | [-.059,.098]  | -0.007                   | [-.080,.067]  |
| Liver Disease               | -0.083                     | [-.217,.052]  | -.136*                   | [-.271,-.000] |
| Cerebrovascular<br>Disease  | -0.019                     | [-.059,.020]  | 0.001                    | [-.032,.034]  |
| Renal Disease               | -.037**                    | [-.063,-.010] | -.032**                  | [-.055,-.008] |
| Congestive Heart<br>Failure | 0.003                      | [-.015,.021]  | 0.009                    | [-.006,.025]  |
| Hemorrhage                  | 0.001                      | [-.058,.060]  | 0.024                    | [-.024,.072]  |
| Depression                  | -.094**                    | [-.134,-.055] | -.113**                  | [-.151,-.075] |
| Diabetes Mellitus           | -.017*                     | [-.032,-.003] | -0.005                   | [-.018,.007]  |
| Dementia                    | -.211**                    | [-.306,-.116] | -.201**                  | [-.293,-.108] |
| Pulmonary Disease           | -0.003                     | [-.022,.017]  | -0.009                   | [-.026,.009]  |
| Cancer                      | -.057**                    | [-.094,-.020] | -.073**                  | [-.109,-.038] |
| Warfarin Prescription       | -.025*                     | [-.047,-.002] | -.033**                  | [-.054,-.013] |
| Academic Medical<br>Center  | .042*                      | [.010,.074]   | .053**                   | [.021,.085]   |

\* p<0.05, \*\* p<0.01

Estimates are the adjusted probabilities obtained using the margin dydx function in STATA 11.0, following logistic regression modeling with random facility level effects.

Appendix C. Prescription Fill Analysis Reported as Odds Ratios

**Adjusted Odds of a Clopidogrel Prescription Fill in the First 7 and First 90 Days Following Hospitalization with Receipt of a Drug Eluting Coronary Artery Stent**

|                         | Clopidogrel<br>Fill 0 to 7 | 95% CI      | Clopidogrel<br>Fill 0 to 90 | 95% CI      |
|-------------------------|----------------------------|-------------|-----------------------------|-------------|
| Age 70 to 74            | 0.9                        | [0.8,1.01]  | 0.93                        | [0.8,1.08]  |
| Age 75 to 79            | 0.9                        | [0.8,1.02]  | 0.91                        | [0.78,1.07] |
| Age 80 to 84            | 0.83**                     | [0.72,0.95] | 0.8**                       | [0.68,0.95] |
| Age >84                 | 0.52**                     | [0.44,0.61] | 0.38**                      | [0.31,0.45] |
| Black                   | 0.58**                     | [0.48,0.69] | 0.55**                      | [0.44,0.68] |
| Female                  | 0.81**                     | [0.74,0.89] | 0.74**                      | [0.66,0.83] |
| Income 2nd Quartile     | 1.04                       | [0.92,1.19] | 1.03                        | [0.87,1.21] |
| Income 3rd Quartile     | 0.9                        | [0.78,1.03] | 0.91                        | [0.77,1.08] |
| Income Top Quartile     | 0.93                       | [0.79,1.08] | 0.9                         | [0.74,1.09] |
| Poverty                 | 0.59                       | [0.29,1.2]  | 0.48                        | [0.2,1.16]  |
| Co-insurance 10%-19%    | 0.64**                     | [0.53,0.76] | 0.62**                      | [0.5,0.77]  |
| Co-insurance 20%-40%    | 0.82**                     | [0.73,0.92] | 0.85**                      | [0.74,0.98] |
| Co-insurance > 40%      | 1.01                       | [0.9,1.14]  | 1.21**                      | [1.04,1.4]  |
| Stent in 2007 vs. 2006  | 1.01                       | [0.93,1.1]  | 0.96                        | [0.87,1.07] |
| Length Of Stay > Median | 0.84**                     | [0.77,0.93] | 0.76**                      | [0.67,0.85] |
| AMI                     | 2.72**                     | [2.41,3.07] | 4.61**                      | [3.88,5.47] |
| Peptic Ulcer            | 1.07                       | [0.62,1.83] | 0.87                        | [0.46,1.65] |
| Liver Disease           | 0.67                       | [0.32,1.42] | 0.42*                       | [0.19,0.96] |
| Cerebrovascular Disease | 0.9                        | [0.7,1.15]  | 1.02                        | [0.75,1.39] |

|                          |        |             |        |             |
|--------------------------|--------|-------------|--------|-------------|
| Renal Disease            | 0.8**  | [0.68,0.94] | 0.76** | [0.62,0.92] |
| Congestive Heart Failure | 1      | [0.89,1.13] | 1.08   | [0.93,1.25] |
| Hemorrhage               | 0.97   | [0.66,1.42] | 1.23   | [0.74,2.05] |
| Depression               | 0.6**  | [0.49,0.73] | 0.45** | [0.36,0.57] |
| Diabetes Mellitus        | 0.91*  | [0.83,1]    | 0.98   | [0.87,1.1]  |
| Dementia                 | 0.32** | [0.21,0.51] | 0.27** | [0.17,0.45] |
| Pulmonary Disease        | 0.99   | [0.87,1.13] | 0.94   | [0.81,1.1]  |
| Cancer                   | 0.75** | [0.61,0.94] | 0.59** | [0.46,0.76] |
| Warfarin Prescription    | 0.86*  | [0.75,0.99] | 0.77** | [0.65,0.9]  |
| Academic Medical Center  | 1.3*   | [1.05,1.6]  | 1.6**  | [1.19,2.14] |

\* p<0.05, \*\* p<0.01
